# Supplementary material
Source: Springer Nature journal article supplement (https://www.springermedizin.de/resource/supplementary/13011_2012_242_MOESM1_ESM.pdf/9628670)

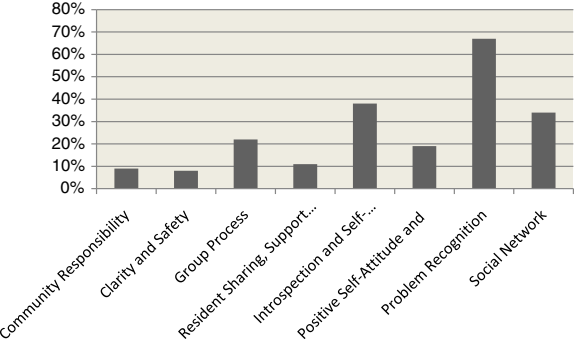

Supplement: MOESM1 [file 9628670]
